# Supplementary material
Source: Springer Nature journal article supplement (https://www.springermedizin.de/resource/supplementary/12955_2013_1326_MOESM1_ESM.pdf/9559574)
Supplement: MOESM1 [file 9559574]

## APPENDIX 1

### Spanish version of SAQ

#### SAQ

*Por favor, observe atentamente las imágenes siguientes, que muestran distintas formas de la columna. Marque el círculo debajo del dibujo que más se parezca a usted.*

#### SAQ Apariencia

Curva del cuerpo

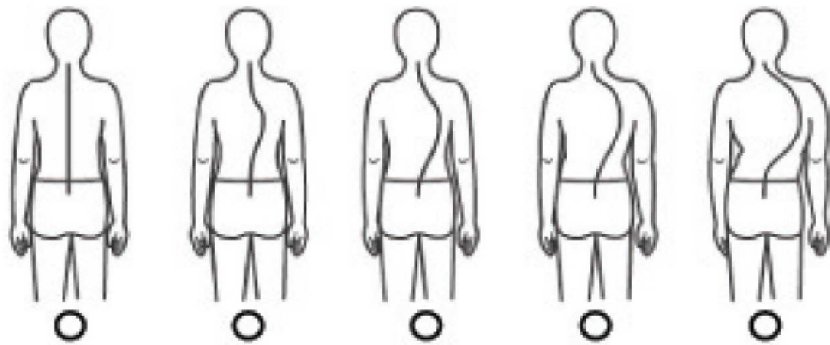

Prominencia de las costillas

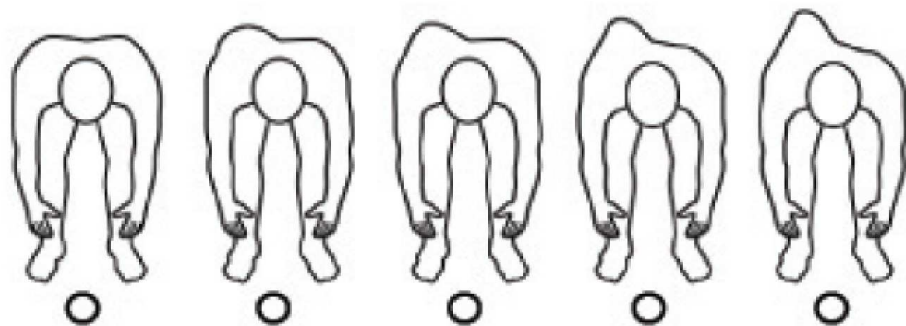

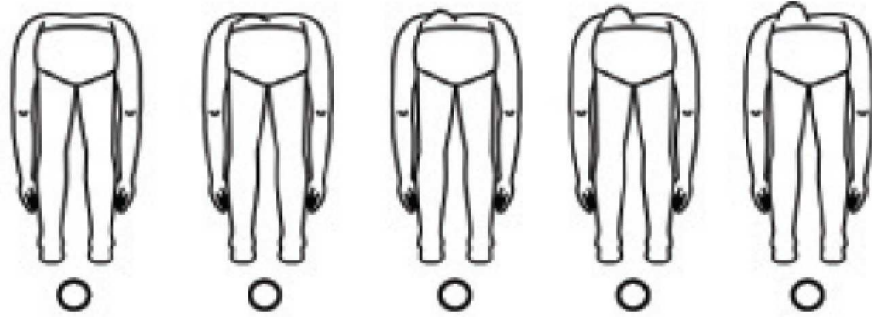

Prominencia lumbar

Cabeza-torax-caderas

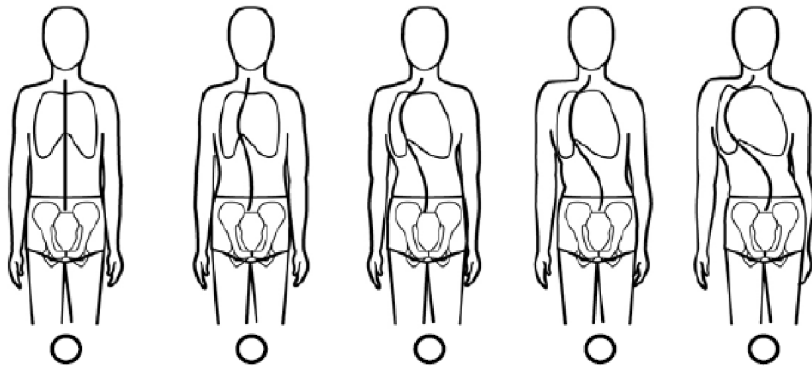

Posición de la cabeza en relación con las caderas

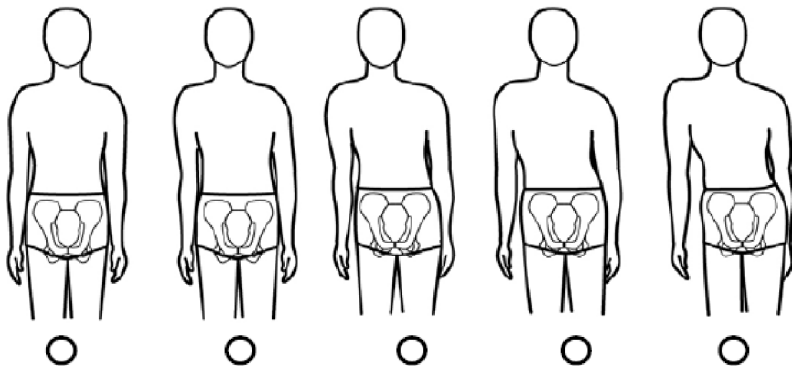

Nivel de los hombros

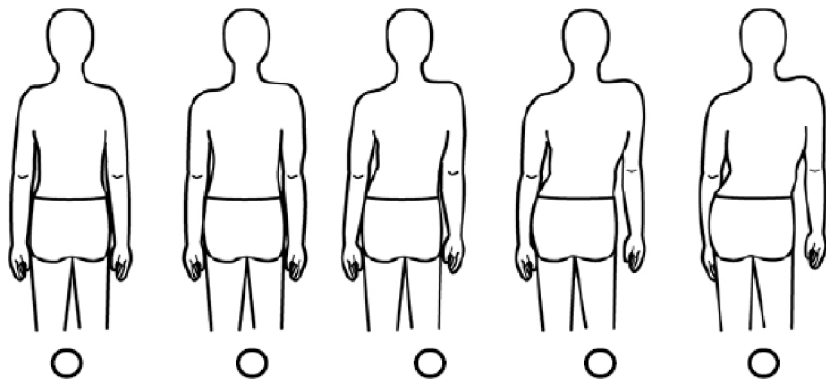

Rotación de los omoplatos

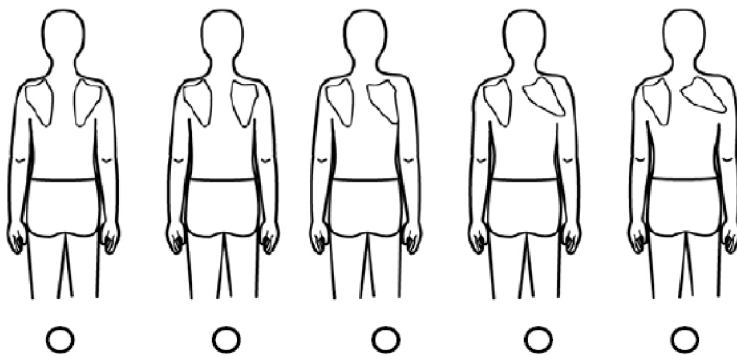

Angulo de los hombros

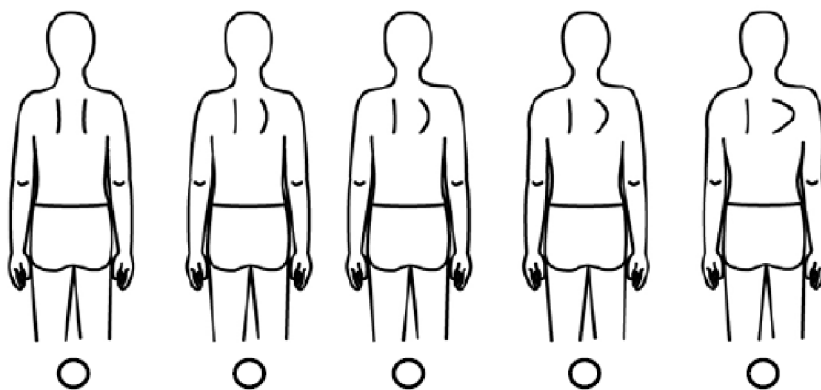

Posición de la cabeza

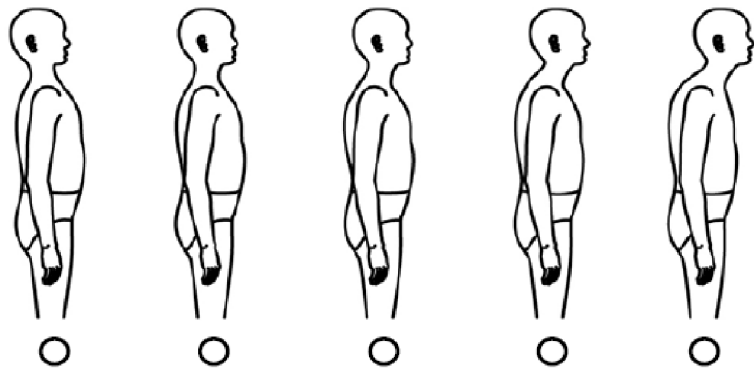

Prominencia de la columna

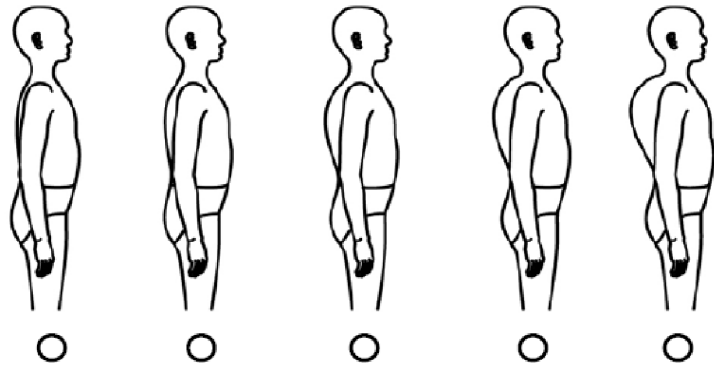

### SAQ Expectativas

Quiero estar más equilibrado

- Cierto
- Bastante cierto
- Algo cierto
- Un poco cierto
- Falso

Quiero tener los hombros más equilibrados

- Cierto
- Bastante cierto
- Algo cierto
- Un poco cierto
- Falso

Quiero tener las caderas más equilibradas

- Cierto
- Bastante cierto
- Algo cierto
- Un poco cierto
- Falso

Quiero tener una cintura más equilibrada

- Cierto
- Bastante cierto
- Algo cierto
- Un poco cierto
- Falso
